# Supplementary material for: Important applications of DNA nanotechnology combined with CRISPR/Cas systems in biotechnology
Source: Royal Society of Chemistry journal article supplement (doi:10.1039/d4ra08325c), 2025-01-01
Supplement: d4ra08325c1.pdf [file d4ra08325c1.pdf]

Data Available statement: Data sharing is not applicable to this article as no new data were created or analyzed in this study.
